# Supplementary material
Source: Springer Nature journal article supplement (https://www.springermedizin.de/resource/supplementary/13256_2011_1782_MOESM1_ESM.pdf/9648442)

10cm/s

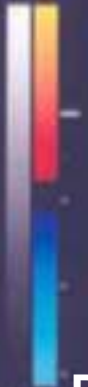

-10cm/s

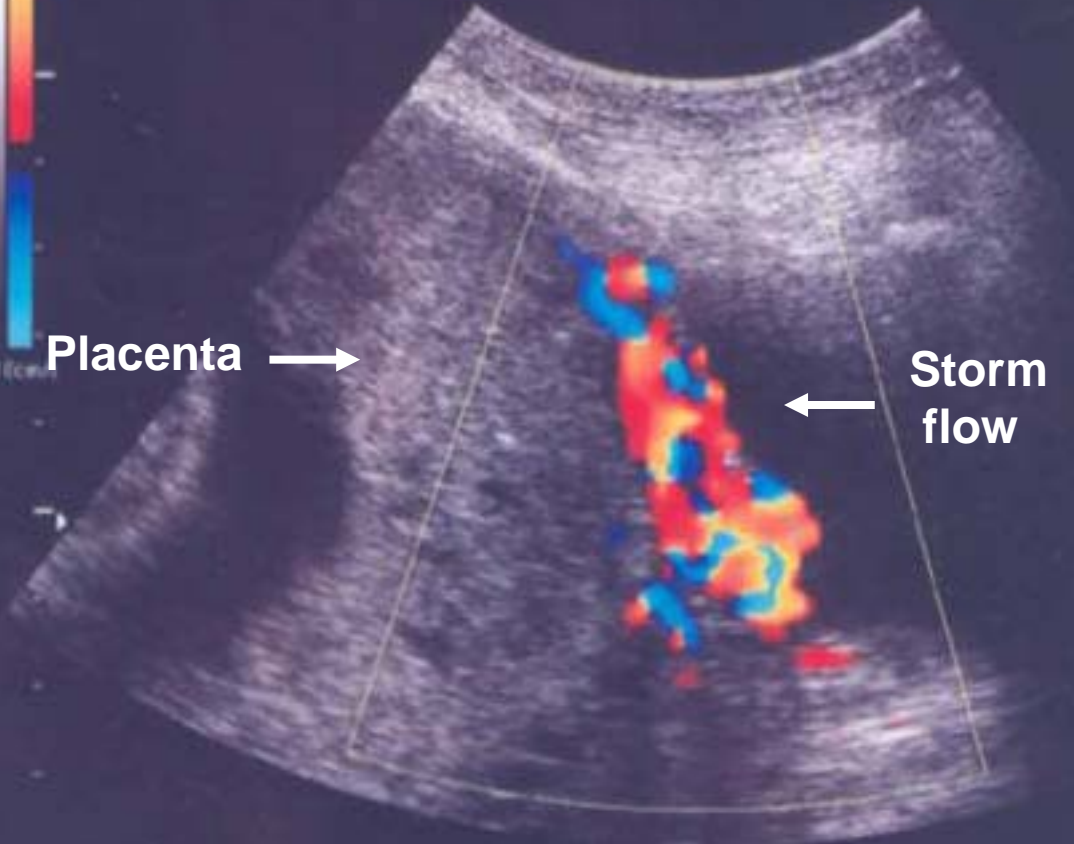

**Placenta** →

← **Storm flow**

Supplement: MOESM1 [file 9648442]
